# Supplementary material for: Construction of Copy Number Variation Map Identifies Small Regions of Overlap and Candidate Genes for Atypical Female Genitalia Development
Source: MDPI journal article supplement (doi:10.3390/reprodmed3020014), 2022-06-14
Supplement: s1 [file s1]

**Table S1.** DSD Characteristics of Patients with AFG.

| <b>Pt #</b> | <b>Sex</b> | <b>Phenotype Category</b> | <b>Specific Phenotype</b>                                                   | <b>Number of DSD Phenotypes</b> |
|-------------|------------|---------------------------|-----------------------------------------------------------------------------|---------------------------------|
| 1           | 46,XX      | Internal                  | Primary amenorrhea                                                          | 1                               |
| 2           | 46,XX      | Internal                  | Aplasia of the uterus                                                       | 1                               |
| 3           | 46,XX      | External                  | Abnormality of the labia                                                    | 1                               |
| 4           | 46,XX      | Both                      | Aplasia of the uterus, fused labia minora, vaginal atresia                  | 2+                              |
| 5           | 46,XX      | Internal                  | Aplasia of the uterus, vaginal atresia                                      | 2+                              |
| 6           | 46,XX      | Internal                  | Primary amenorrhea                                                          | 1                               |
| 7           | 46,XX      | Internal                  | Aplasia of the uterus, hypoplasia of the vagina                             | 2+                              |
| 8           | Other      | Unspecified               | Abnormality of the female genitalia                                         | 1                               |
| 9           | 46,XX      | Internal                  | Abnormality of the uterus                                                   | 1                               |
| 10          | 46,XX      | Unspecified               | Female pseudohermaphroditism                                                | 1                               |
| 11          | 46,XX      | External                  | Abnormality of the labia                                                    | 1                               |
| 12          | Other      | Unspecified               | Abnormality of the female genitalia                                         | 1                               |
| 13          | Other      | Both                      | Adrenogenital syndrome, aplasia/hypoplasia of the breasts, uterine neoplasm | 2+                              |
| 14          | 46,XX      | Both                      | Absent nipple, primary amenorrhea                                           | 2+                              |
| 15          | 46,XX      | Internal                  | Primary amenorrhea                                                          | 1                               |
| 16          | Unknown    | Internal                  | Secondary amenorrhea                                                        | 1                               |
| 17          | Unknown    | Internal                  | Primary amenorrhea                                                          | 1                               |
| 18          | Unknown    | Both                      | Aplasia of the uterus, hypoplasia of the vagina, absent nipple              | 2+                              |
| 19          | 46,XX      | External                  | Fused labia minora                                                          | 1                               |
| 20          | 46,XX      | Internal                  | Secondary amenorrhea                                                        | 1                               |
| 21          | 46,XX      | Internal                  | Ovarian cyst                                                                | 1                               |
| 22          | 46,XX      | Internal                  | Abnormality of the vagina                                                   | 1                               |
| 23          | 46,XX      | Internal                  | Primary amenorrhea                                                          | 1                               |
| 24          | 46,XX      | External                  | Abnormality of the labia                                                    | 1                               |
| 25          | 46,XX      | External                  | Clitoral hypertrophy                                                        | 1                               |
| 26          | 46,XX      | External                  | Abnormality of the uterus, aplasia/hypoplasia of the breasts                | 2+                              |
| 27          | 46,XX      | External                  | Abnormality of the labia                                                    | 1                               |
| 28          | 46,XX      | Internal                  | Abnormality of the uterus, abnormality of the vagina                        | 2+                              |
| 29          | 46,XX      | Unspecified               | Abnormality of the female genitalia                                         | 1                               |

|    |       |             |                                                                                |     |
|----|-------|-------------|--------------------------------------------------------------------------------|-----|
| 30 | 46,XY | Male        | Abnormality of the female genitalia, abnormality of the male genitalia         | 2+  |
| 31 | 46,XX | Internal    | Secondary amenorrhea                                                           | 1   |
| 32 | 46,XX | Internal    | Ovarian cyst                                                                   | 1   |
| 33 | 46,XX | External    | Abnormality of the labia                                                       | 1   |
| 34 | 46,XX | Unspecified | Abnormality of the female genitalia                                            | 1   |
| 35 | 46,XX | Unspecified | Abnormality of the female genitalia                                            | 1   |
| 36 | 46,XX | Internal    | Ovarian cyst                                                                   | 1   |
| 37 | 46,XX | External    | Abnormality of the labia                                                       | 1   |
| 38 | 46,XX | External    | Abnormality of the labia                                                       | 1   |
| 39 | 46,XX | External    | Abnormality of the labia                                                       | 1   |
| 40 | 46,XX | External    | Clitoral hypertrophy                                                           | 1   |
| 41 | 46,XX | Unspecified | N/A                                                                            | N/A |
| 42 | 46,XX | Internal    | Ovarian cyst                                                                   | 1   |
| 43 | 46,XX | Internal    | Secondary amenorrhea                                                           | 1   |
| 44 | 46,XX | Unspecified | Abnormality of the female genitalia                                            | 1   |
| 45 | 46,XX | Internal    | Bicornuate uterus                                                              | 1   |
| 46 | 46,XX | Internal    | Ovarian cyst                                                                   | 1   |
| 47 | 46,XX | Internal    | Abnormality of the ovary                                                       | 1   |
| 48 | 46,XX | External    | Abnormality of the labia                                                       | 1   |
| 49 | 46,XX | Internal    | Secondary amenorrhea                                                           | 1   |
| 50 | 46,XX | External    | Abnormality of the labia                                                       | 1   |
| 51 | 46,XX | Internal    | Premature ovarian insufficiency                                                | 1   |
| 52 | 46,XX | Both        | Labial hypertrophy, rectovaginal fistula                                       | 2+  |
| 53 | 46,XX | External    | Abnormality of the labia                                                       | 1   |
| 54 | 46,XX | Internal    | Intrauterine growth retardation, premature ovarian insufficiency               | 2+  |
| 55 | 46,XX | Internal    | Secondary amenorrhea                                                           | 1   |
| 56 | 46,XX | Unspecified | Abnormality of the female genitalia                                            | 1   |
| 57 | 46,XX | Internal    | Vaginal atresia                                                                | 1   |
| 58 | 46,XX | Internal    | Abnormality of female internal genitalia, mild intrauterine growth retardation | 2+  |
| 59 | 46,XX | Unspecified | Abnormality of the female genitalia                                            | 1   |
| 60 | 46,XX | Internal    | Urogenital sinus anomaly                                                       | 1   |
| 61 | 46,XX | Internal    | Bicornuate uterus                                                              | 1   |

|    |         |             |                                                                                                                                                                  |    |
|----|---------|-------------|------------------------------------------------------------------------------------------------------------------------------------------------------------------|----|
| 62 | 46,XX   | Both        | Clitoral hypertrophy, intrauterine growth retardation                                                                                                            | 2+ |
| 63 | 46,XY   | External    | Abnormality of the labia                                                                                                                                         | 1  |
| 64 | 46,XX   | Internal    | Polycystic ovaries                                                                                                                                               | 1  |
| 65 | 46,XX   | External    | Hypoplastic labia minora                                                                                                                                         | 1  |
| 66 | 46,XX   | Internal    | Ovarian cyst, precocious puberty in females                                                                                                                      | 2+ |
| 67 | 46,XX   | Internal    | Premature ovarian insufficiency                                                                                                                                  | 1  |
| 68 | 46,XX   | Unspecified | Abnormality of the female genitalia                                                                                                                              | 1  |
| 69 | 46,XX   | Internal    | Urethrocele                                                                                                                                                      | 1  |
| 70 | 46,XY   | Internal    | Ovarian gonadoblastoma                                                                                                                                           | 1  |
| 71 | 46,XX   | Internal    | Aplasia/hypoplasia of the ovary, aplasia/hypoplasia of the uterus                                                                                                | 2+ |
| 72 | 46,XX   | Internal    | Bicornuate uterus                                                                                                                                                | 1  |
| 73 | 46,XX   | Internal    | Aplasia of the vagina, aplasia/hypoplasia of the uterus, delayed puberty, primary amenorrhea                                                                     | 2+ |
| 74 | 46,XX   | Internal    | Polycystic ovaries, delayed puberty                                                                                                                              | 2+ |
| 75 | 46,XX   | Internal    | Polycystic ovaries                                                                                                                                               | 1  |
| 76 | 46,XY   | Unspecified | Ambiguous genitalia: female                                                                                                                                      | 1  |
| 77 | 46,XX   | Internal    | Ectopic ovary, intrauterine growth retardation                                                                                                                   | 2+ |
| 78 | 46,XY   | External    | Labial hypertrophy                                                                                                                                               | 1  |
| 79 | 46,XX   | Internal    | Female hypogonadism                                                                                                                                              | 1  |
| 80 | 46,XX   | Internal    | Premature ovarian insufficiency                                                                                                                                  | 1  |
| 81 | 46,XX   | Internal    | Premature ovarian insufficiency                                                                                                                                  | 1  |
| 82 | 46,XX   | Internal    | Premature ovarian insufficiency                                                                                                                                  | 1  |
| 83 | Unknown | Internal    | Ovarian cyst                                                                                                                                                     | 1  |
| 84 | Unknown | Internal    | Primary amenorrhea                                                                                                                                               | 1  |
| 85 | Unknown | Internal    | Urogenital sinus anomaly                                                                                                                                         | 1  |
| 86 | Unknown | Internal    | Vaginal atresia                                                                                                                                                  | 1  |
| 87 | 46,XX   | Internal    | Secondary amenorrhea                                                                                                                                             | 1  |
| 88 | 46,XX   | Internal    | Menorrhagia                                                                                                                                                      | 1  |
| 89 | 46,XX   | Internal    | Bicornuate uterus                                                                                                                                                | 1  |
| 90 | 46,XX   | Internal    | Vaginal hernia                                                                                                                                                   | 1  |
| 91 | 46,XX   | Internal    | Polycystic ovaries                                                                                                                                               | 1  |
| 92 | 46,XX   | Both        | Aplasia of the uterus, clitoral hypertrophy, genital tract atresia, gonadal tissue inappropriate for external genitalia or chromosomal sex, true hermaphroditism | 2+ |

|     |         |          |                                                                                                                       |    |
|-----|---------|----------|-----------------------------------------------------------------------------------------------------------------------|----|
| 93  | 46,XY   | Male     | Abnormality of the fallopian tube, bilateral cryptorchidism, perineal hypospadias                                     | 2+ |
| 94  | 46,XX   | Internal | Urogenital sinus anomaly                                                                                              | 1  |
| 95  | 46,XX   | Internal | Hypogonadotropic hypogonadism, primary amenorrhea                                                                     | 2+ |
| 96  | 46,XX   | Internal | Mild intrauterine growth retardation, urethrocele                                                                     | 2+ |
| 97  | 46,XX   | Internal | Secondary amenorrhea                                                                                                  | 1  |
| 98  | 46,XX   | Internal | Menorrhagia, precocious puberty, intrauterine growth                                                                  | 2+ |
| 99  | 46,XX   | Internal | Amenorrhea                                                                                                            | 1  |
| 100 | 46,XX   | Internal | Aplasia of the uterus                                                                                                 | 1  |
| 101 | 46,XX   | Internal | Aplasia of the ovary                                                                                                  | 1  |
| 102 | Unknown | External | Clitoral hypertrophy                                                                                                  | 1  |
| 103 | 46,XX   | Internal | Abnormality of the menstrual cycle, abnormality of the uterus, abnormality of the vagina                              | 2+ |
| 104 | 46,XX   | Internal | Longitudinal vaginal septum                                                                                           | 1  |
| 105 | 46,XX   | Internal | Menorrhagia                                                                                                           | 1  |
| 106 | 46,XX   | Internal | Polycystic ovaries                                                                                                    | 1  |
| 107 | 46,XY   | Male     | Male pseudohermaphroditism, abnormality of the uterus, cryptorchidism, gonadal dysgenesis, wide intermammary distance | 2+ |
| 108 | 46,XX   | Internal | Oligomenorrhea                                                                                                        | 1  |
| 109 | 46,XX   | Internal | Intrauterine growth retardation, ovarian cyst                                                                         | 2+ |
| 110 | 46,XX   | Internal | Premature ovarian insufficiency                                                                                       | 1  |
| 111 | 46,XX   | Internal | Ovarian cyst                                                                                                          | 1  |
| 112 | 46,XX   | Internal | Menorrhagia                                                                                                           | 1  |
| 113 | 46,XX   | Internal | Premature ovarian insufficiency, gonadal dysgenesis                                                                   | 2+ |
| 114 | 46,XX   | Both     | Dysgerminoma, breast carcinoma                                                                                        | 2+ |
| 115 | 46,XX   | Internal | Abnormality of the uterus, severe intrauterine growth retardation                                                     | 2+ |
| 116 | 46,XY   | Internal | Abnormality of the uterus                                                                                             | 1  |
| 117 | 46,XX   | Internal | Premature ovarian insufficiency                                                                                       | 1  |
| 118 | 46,XX   | Internal | Aplasia/hypoplasia of the ovary, aplasia/hypoplasia of the uterus, secondary amenorrhea                               | 2+ |
| 119 | 46,XX   | Internal | Secondary amenorrhea                                                                                                  | 1  |
| 120 | 46,XX   | Internal | Abnormality of the uterus                                                                                             | 1  |

|     |       |             |                                                                                |    |
|-----|-------|-------------|--------------------------------------------------------------------------------|----|
| 121 | 46,XX | Internal    | Polycystic ovaries                                                             | 1  |
| 122 | 46,XX | Internal    | Aplasia of the ovary, hypoplasia of the uterus                                 | 2+ |
| 123 | 46,XX | Internal    | Premature ovarian insufficiency                                                | 1  |
| 124 | 46,XX | Internal    | Aplasia of the uterus                                                          | 1  |
| 125 | 46,XX | Internal    | Secondary amenorrhea                                                           | 1  |
| 126 | 46,XY | Internal    | Gonadal dysgenesis, primary amenorrhea                                         | 2+ |
| 127 | 46,XX | Internal    | Ovarian cyst, partial vaginal septum                                           | 2+ |
| 128 | 46,XX | Internal    | Premature ovarian insufficiency, primary amenorrhea                            | 2+ |
| 129 | 46,XX | Internal    | Premature ovarian insufficiency, spontaneous abortion                          | 2+ |
| 130 | 46,XX | Internal    | Aplasia of the ovary, intrauterine growth retardation                          | 2+ |
| 131 | 46,XY | Unspecified | Abnormality of the female genitalia                                            | 1  |
| 132 | 46,XX | External    | Fused labia minora                                                             | 1  |
| 133 | 46,XX | Unspecified | Abnormality of the female genitalia                                            | 1  |
| 134 | 46,XX | External    | Abnormality of the labia                                                       | 1  |
| 135 | 46,XX | External    | Abnormality of the labia                                                       | 1  |
| 136 | 46,XX | Internal    | Premature ovarian insufficiency                                                | 1  |
| 137 | 46,XX | Internal    | Streak ovary                                                                   | 1  |
| 138 | 46,XX | Unspecified | Abnormality of the female genitalia                                            | 1  |
| 139 | 46,XX | Internal    | Abnormality of the uterus, streak ovary                                        | 2+ |
| 140 | 46,XY | External    | Abnormality of the labia                                                       | 1  |
| 141 | 46,XX | Both        | Abnormality of the uterus, clitoral hypertrophy                                | 2+ |
| 142 | 46,XX | Internal    | Menstrual irregularities, premature ovarian insufficiency                      | 2+ |
| 143 | 46,XY | External    | Abnormality of the labia, hypoplastic nipples                                  | 2+ |
| 144 | 46,XX | External    | Abnormality of the labia                                                       | 1  |
| 145 | 46,XY | Internal    | Abnormality of the uterus                                                      | 1  |
| 146 | 46,XX | External    | Clitoral hypertrophy                                                           | 1  |
| 147 | 46,XY | Male        | Male pseudohermaphroditism, streak ovary, chordee, cryptorchidism, hypospadias | 2+ |
| 148 | 46,XX | External    | Abnormality of the labia, hypoplastic nipples, wide intermamillary distance    | 2+ |
| 149 | 46,XX | External    | Abnormality of the labia                                                       | 1  |

|     |       |             |                                                                                                    |    |
|-----|-------|-------------|----------------------------------------------------------------------------------------------------|----|
| 150 | 46,XX | External    | Abnormality of the labia, clitoral hypertrophy                                                     | 2+ |
| 151 | 46,XX | External    | Clitoral hypertrophy, hypoplastic nipples                                                          | 2+ |
| 152 | 46,XX | External    | Abnormality of the labia                                                                           | 1  |
| 153 | 46,XX | External    | Clitoral hypertrophy                                                                               | 1  |
| 154 | 46,XX | Internal    | Abnormality of the uterus, streak ovary                                                            | 2+ |
| 155 | 46,XX | Unspecified | Abnormality of the female genitalia, wide intermamillary distance                                  | 2+ |
| 156 | 46,XX | Unspecified | Abnormality of the female genitalia, abnormality of the uterus, streak ovary                       | 2+ |
| 157 | 46,XX | Unspecified | Abnormality of the female genitalia                                                                | 1  |
| 158 | 46,XX | Both        | Abnormality of the uterus, wide intermamillary distance                                            | 2+ |
| 159 | 46,XY | Male        | Male pseudohermaphroditism, abnormality of the uterus, absent testis, hypospadias                  | 2+ |
| 160 | 46,XX | Both        | Abnormality of the labia, abnormality of the uterus, abnormal vagina morphology                    | 2+ |
| 161 | 46,XX | Internal    | Aplasia of the ovary, streak ovary                                                                 | 2+ |
| 162 | 46,XX | External    | Clitoral hypertrophy                                                                               | 1  |
| 163 | 46,XX | Internal    | Abnormality of the uterus, abnormal vagina morphology                                              | 2+ |
| 164 | 46,XX | Internal    | Abnormality of the uterus, abnormal vagina morphology                                              | 2+ |
| 165 | 46,XX | External    | Abnormality of the labia                                                                           | 1  |
| 166 | 46,XX | External    | Abnormality of the labia                                                                           | 1  |
| 167 | 46,XX | Unspecified | Abnormality of the female genitalia, wide intermamillary distance                                  | 2+ |
| 168 | 46,XX | External    | Abnormality of the labia, hypoplastic nipples, wide intermamillary distance                        | 2+ |
| 169 | 46,XX | External    | Fused labia minora                                                                                 | 1  |
| 170 | 46,XX | External    | Abnormality of the labia, clitoral hypertrophy, wide intermamillary distance                       | 2+ |
| 171 | 46,XX | Both        | Abnormality of the labia, abnormality of the uterus, vaginal atresia, wide intermamillary distance | 2+ |

|     |       |             |                                                                        |    |
|-----|-------|-------------|------------------------------------------------------------------------|----|
| 172 | 46,XX | Unspecified | Abnormality of the female genitalia, delayed puberty, ovarian cyst     | 2+ |
| 173 | 46,XX | External    | Abnormality of the labia                                               | 1  |
| 174 | 46,XX | External    | Abnormality of the labia                                               | 1  |
| 175 | 46,XX | Unspecified | Abnormality of the female genitalia, aplasia/hypoplasia of the breasts | 2+ |
| 176 | 46,XX | Unspecified | Abnormality of the female genitalia, wide intermamillary distance      | 2+ |
| 177 | 46,XX | Unspecified | Abnormality of the female genitalia                                    | 1  |
| 178 | 46,XX | Internal    | Secondary amenorrhea                                                   | 1  |
| 179 | 46,XX | Unspecified | Abnormality of the female genitalia                                    | 1  |
| 180 | 46,XX | Internal    | Delayed puberty, primary amenorrhea                                    | 2+ |
| 181 | 46,XX | Unspecified | Abnormality of the female genitalia                                    | 1  |
| 182 | 46,XX | Internal    | Abnormality of the uterus                                              | 1  |
| 183 | 46,XX | External    | Abnormality of the labia                                               | 1  |
| 184 | 46,XX | Unspecified | Abnormality of the female genitalia                                    | 1  |
| 185 | 46,XX | Unspecified | Abnormality of the female genitalia, wide intermamillary distance      | 2+ |
| 186 | 46,XX | External    | Abnormality of the labia                                               | 1  |
| 187 | 46,XX | Unspecified | Abnormality of the female genitalia                                    | 1  |
| 188 | 46,XX | Unspecified | Abnormality of the female genitalia                                    | 1  |
| 189 | 46,XX | External    | Abnormality of the labia, wide intermamillary distance                 | 2+ |
| 190 | 46,XX | Internal    | Streak ovary                                                           | 1  |
| 191 | 46,XX | External    | Abnormality of the labia                                               | 1  |
| 192 | 46,XX | External    | Abnormality of the labia                                               | 1  |
| 193 | 46,XX | Internal    | Abnormality of the uterus, abnormal vagina morphology                  | 2+ |
| 194 | 46,XX | External    | Abnormality of the labia, wide intermamillary distance                 | 2+ |
| 195 | 46,XX | Internal    | Abnormality of the uterus                                              | 1  |
| 196 | 46,XX | External    | Fused labia minora                                                     | 1  |
| 197 | 46,XX | External    | Abnormality of the labia, wide intermamillary distance                 | 2+ |
| 198 | 46,XX | Unspecified | Female pseudohermaphroditism                                           | 1  |

|     |       |             |                                                                                         |    |
|-----|-------|-------------|-----------------------------------------------------------------------------------------|----|
| 199 | 46,XX | Unspecified | Abnormality of the female genitalia                                                     | 1  |
| 200 | 46,XX | Internal    | Abnormality of the uterus                                                               | 1  |
| 201 | 46,XX | External    | Abnormality of the labia                                                                | 1  |
| 202 | 46,XX | External    | Fused labia minora                                                                      | 1  |
| 203 | 46,XY | Both        | Aplasia of the ovary, gonadal dysgenesis, wide intermamillary distance                  | 2+ |
| 204 | 46,XX | External    | Abnormality of the labia                                                                | 1  |
| 205 | 46,XX | External    | Abnormality of the labia                                                                | 1  |
| 206 | 46,XX | External    | Abnormality of the labia                                                                | 1  |
| 207 | 46,XX | Internal    | Streak ovary                                                                            | 1  |
| 208 | 46,XY | Unspecified | Abnormality of the female genitalia, clitoral hypertrophy                               | 2+ |
| 209 | 46,XX | External    | Abnormality of the labia, hypoplastic nipples, wide intermamillary distance             | 2+ |
| 210 | 46,XX | Both        | Streak ovary, wide intermamillary distance                                              | 2+ |
| 211 | 46,XX | External    | Clitoral hypertrophy                                                                    | 1  |
| 212 | 46,XX | Internal    | Abnormality of the uterus                                                               | 1  |
| 213 | 46,XX | External    | Abnormality of the labia                                                                | 1  |
| 214 | 46,XX | External    | Abnormality of the labia, wide intermamillary distance                                  | 2+ |
| 215 | 46,XX | External    | Abnormality of the labia                                                                | 1  |
| 216 | 46,XX | Internal    | Aplasia of the uterus, aplasia of the ovary                                             | 2+ |
| 217 | 46,XX | External    | Abnormality of the labia                                                                | 1  |
| 218 | 46,XX | External    | Abnormality of the labia                                                                | 1  |
| 219 | 46,XX | External    | Abnormality of the labia                                                                | 1  |
| 220 | 46,XX | External    | Abnormality of the labia                                                                | 1  |
| 221 | 46,XX | Internal    | Abnormality of the uterus                                                               | 1  |
| 222 | 46,XX | Unspecified | Abnormality of the female genitalia                                                     | 2+ |
| 223 | 46,XX | Both        | Secondary amenorrhea, abnormality of secondary sexual hair, hypoplastic nipples         | 2+ |
| 224 | 46,XX | Internal    | Primary amenorrhea                                                                      | 1  |
| 225 | 46,XX | Both        | Rectovaginal fistula, wide intermamillary distance                                      | 2+ |
| 226 | 46,XX | Both        | Abnormality of the labia, hypoplastic nipples, ovarian cyst                             | 2+ |
| 227 | 46,XX | Unspecified | Abnormality of the female genitalia, supernumerary nipple, wide intermamillary distance | 2+ |



|     |       |             |                                                                                                                               |    |
|-----|-------|-------------|-------------------------------------------------------------------------------------------------------------------------------|----|
| 228 | 46,XX | Internal    | Rectovaginal fistula                                                                                                          | 1  |
| 229 | 46,XX | Both        | Uterine neoplasm,<br>aplasia/hypoplasia of the breasts                                                                        | 2+ |
| 230 | 46,XX | Internal    | Streak ovary                                                                                                                  | 1  |
| 231 | 46,XX | External    | Abnormality of the labia                                                                                                      | 1  |
| 232 | 46,XX | Unspecified | Abnormality of the female<br>genitalia                                                                                        | 1  |
| 233 | 46,XX | Unspecified | Abnormality of the female<br>genitalia, wide intermamillary<br>distance                                                       | 2+ |
| 234 | 46,XY | Internal    | Gonadal dysgenesis, ovarian cyst,<br>streak ovary                                                                             | 2+ |
| 235 | 46,XX | External    | Clitoral hypertrophy                                                                                                          | 1  |
| 236 | 46,XX | Internal    | Abnormality of the uterus                                                                                                     | 1  |
| 237 | 46,XX | External    | Abnormality of the labia                                                                                                      | 1  |
| 238 | 46,XX | Both        | Abnormal external genitalia,<br>abnormality of the uterus,<br>abnormal nipple morphology                                      | 2+ |
| 239 | 46,XX | External    | Clitoral hypertrophy,<br>supernumerary nipple                                                                                 | 2+ |
| 240 | 46,XY | Both        | Clitoral hypertrophy, streak ovary                                                                                            | 2+ |
| 241 | 46,XX | Internal    | Hypogonadotrophic<br>hypogonadism, primary<br>amenorrhea                                                                      | 2+ |
| 242 | 46,XX | Unspecified | Abnormality of the female<br>genitalia, abnormality of the uterus,<br>streak ovary, supernumerary nipple                      | 2+ |
| 243 | 46,XX | Both        | Abnormality of the labia,<br>abnormality of the uterus, wide<br>intermamillary distance                                       | 2+ |
| 244 | 46,XX | Both        | Abnormality of the labia, aplasia of<br>the ovary, aplasia of the uterus,<br>vaginal atresia, wide<br>intermamillary distance | 2+ |
| 245 | 46,XX | Internal    | Abnormality of the uterus, vaginal<br>atresia                                                                                 | 2+ |
| 246 | 46,XX | External    | Hypoplastic female external<br>genitalia                                                                                      | 1  |
| 247 | 46,XX | External    | Abnormality of the labia                                                                                                      | 1  |
| 248 | 46,XX | Internal    | Aplasia of the ovary, aplasia of the<br>uterus, vaginal atresia                                                               | 2+ |
| 249 | 46,XY | External    | Abnormal external genitalia,<br>abnormality of the labia                                                                      | 2+ |
| 250 | 46,XX | Internal    | Abnormality of the uterus, vaginal<br>atresia                                                                                 | 2+ |
| 251 | 46,XX | External    | Hypoplastic female external<br>genitalia                                                                                      | 1  |

|     |                 |             |                                                                                          |    |
|-----|-----------------|-------------|------------------------------------------------------------------------------------------|----|
| 252 | 46,XX           | Internal    | Aplasia of the ovary                                                                     | 1  |
| 253 | 46,XX           | External    | Abnormality of the labia                                                                 | 1  |
| 254 | 46,XX           | Internal    | Abnormality of the uterus                                                                | 1  |
| 255 | 46,XY           | External    | Abnormality of the labia                                                                 | 1  |
| 256 | 46,XY           | Internal    | Aplasia of the uterus, vaginal atresia, streak ovary                                     | 2+ |
| 257 | 46,XX           | External    | Clitoral hypertrophy                                                                     | 1  |
| 258 | 46,XX           | External    | Clitoral hypertrophy                                                                     | 1  |
| 259 | 46,XX           | External    | Abnormality of the labia, hypoplastic female external genitalia                          | 2+ |
| 260 | 46,XX           | External    | Abnormality of the labia                                                                 | 1  |
| 261 | 46,XX           | Internal    | Primary amenorrhea                                                                       | 1  |
| 262 | 46,XX           | External    | Abnormality of the labia                                                                 | 1  |
| 263 | 46,XX           | Internal    | Abnormality of the uterus, vaginal atresia                                               | 2+ |
| 264 | 46,XX           | External    | Fused labia minora                                                                       | 1  |
| 265 | 46,XY<br>Female | Internal    | Aplasia of the uterus                                                                    | 1  |
| 266 | 46,XX           | External    | Abnormality of the labia, clitoral hypertrophy                                           | 2+ |
| 267 | 46,XX           | External    | Abnormality of the labia                                                                 | 1  |
| 268 | 46,XX           | Internal    | Abnormality of the uterus                                                                | 1  |
| 269 | 46,XX           | Internal    | Abnormality of the uterus                                                                | 1  |
| 270 | 46,XX           | Internal    | Aplasia of the ovary                                                                     | 1  |
| 271 | 46,XX           | External    | Hypoplastic female external genitalia, hypoplastic nipples, wide intermamillary distance | 2+ |
| 272 | 46,XX           | External    | Abnormality of the labia                                                                 | 1  |
| 273 | 46,XX           | Internal    | Abnormality of the uterus                                                                | 1  |
| 274 | 46,XX           | Both        | Abnormality of the uterus, rectovaginal fistula, wide intermamillary distance            | 2+ |
| 275 | 46,XX           | External    | Hypoplastic female external genitalia                                                    | 1  |
| 276 | 46,XX           | Unspecified | Abnormality of the female genitalia, aplasia of the uterus, vaginal atresia              | 2+ |
| 277 | 46,XX           | Both        | Primary amenorrhea, aplasia/hypoplasia of the breasts, supernumerary nipple              | 2+ |
| 278 | 46,XX           | Both        | Hypogonadotropic hypogonadism, primary amenorrhea, supernumerary nipple                  | 2+ |
| 279 | 46,XX           | Internal    | Abnormal vagina morphology                                                               | 1  |

|     |         |             |                                                                              |    |
|-----|---------|-------------|------------------------------------------------------------------------------|----|
| 280 | 46,XX   | Internal    | Delayed puberty, secondary amenorrhea                                        | 2+ |
| 281 | 46,XX   | Internal    | Abnormality of the uterus, aplasia of the ovary                              | 2+ |
| 282 | 46,XX   | External    | Abnormality of the labia                                                     | 1  |
| 283 | 46,XX   | Internal    | Secondary amenorrhea                                                         | 1  |
| 284 | 46,XX   | External    | Clitoral hypertrophy                                                         | 1  |
| 285 | 46,XX   | External    | Hypoplastic female external genitalia                                        | 1  |
| 286 | 46,XX   | External    | Abnormality of the labia                                                     | 1  |
| 287 | 46,XX   | External    | Hypoplastic female external genitalia                                        | 1  |
| 288 | 46,XX   | External    | Hypoplastic female external genitalia, hypoplastic nipples                   | 2+ |
| 289 | 46,XX   | Internal    | Primary amenorrhea                                                           | 1  |
| 290 | 46,XX   | External    | Abnormality of the labia, clitoral hypertrophy, wide intermamillary distance | 2+ |
| 291 | 46,XX   | External    | Abnormality of the labia, abnormal nipple morphology                         | 2+ |
| 292 | 46,XX   | External    | Hypoplastic female external genitalia                                        | 1  |
| 293 | 46,XX   | External    | Hypoplastic female external genitalia, wide intermamillary distance          | 2+ |
| 294 | Unknown | Internal    | Secondary amenorrhea                                                         | 1  |
| 295 | 46,XX   | Internal    | Premature ovarian insufficiency                                              | 1  |
| 296 | 46,XX   | Internal    | Female hypogonadism, premature ovarian insufficiency                         | 2+ |
| 297 | 46,XX   | Internal    | Premature ovarian insufficiency                                              | 1  |
| 298 | 46,XX   | Unspecified | Abnormality of the female genitalia                                          | 1  |
| 299 | 46,XX   | Internal    | Abnormality of the uterus, primary amenorrhea                                | 2+ |
| 300 | 46,XX   | External    | Clitoral hypertrophy                                                         | 1  |

**Table S2.** Common Comorbidities in Patients with AFG.

| <b>Phenotype</b>                | <b>Count</b> | <b>% of total</b> |
|---------------------------------|--------------|-------------------|
| Intellectual disability         | 141          | 47%               |
| Short stature                   | 106          | 35%               |
| Micrognathia                    | 81           | 27%               |
| Microcephaly                    | 73           | 24%               |
| Low-set ears                    | 70           | 23%               |
| Muscular hypotonia              | 65           | 22%               |
| Small for gestational age       | 64           | 21%               |
| Hypertelorism                   | 62           | 21%               |
| Proportionate short stature     | 55           | 18%               |
| Abnormality of the pinna        | 53           | 18%               |
| High palate                     | 47           | 16%               |
| Epicanthus                      | 46           | 15%               |
| Short neck                      | 44           | 15%               |
| Wide nasal bridge               | 39           | 13%               |
| Depressed nasal bridge          | 38           | 13%               |
| Upslanted palpebral fissure     | 37           | 12%               |
| Ventricular septal defect       | 36           | 12%               |
| Single transverse palmar crease | 35           | 12%               |
| Posteriorly rotated ears        | 34           | 11%               |
| Congenital microcephaly         | 33           | 11%               |
| Downturned corners of mouth     | 31           | 10%               |
| Premature birth                 | 31           | 10%               |
| Scoliosis                       | 30           | 10%               |
| Strabismus                      | 30           | 10%               |
| Frontal bossing                 | 29           | 10%               |
| Finger clinodactyly             | 29           | 10%               |
| Ptosis                          | 29           | 10%               |
